# Supplementary material for: Autophagy Induction by Silibinin Positively Contributes to Its Anti-Metastatic Capacity via AMPK/mTOR Pathway in Renal Cell Carcinoma
Source: MDPI journal article supplement (doi:10.3390/ijms16048415), 2015-04-15
Supplement: s1 [file s1]

# Supplementary Information

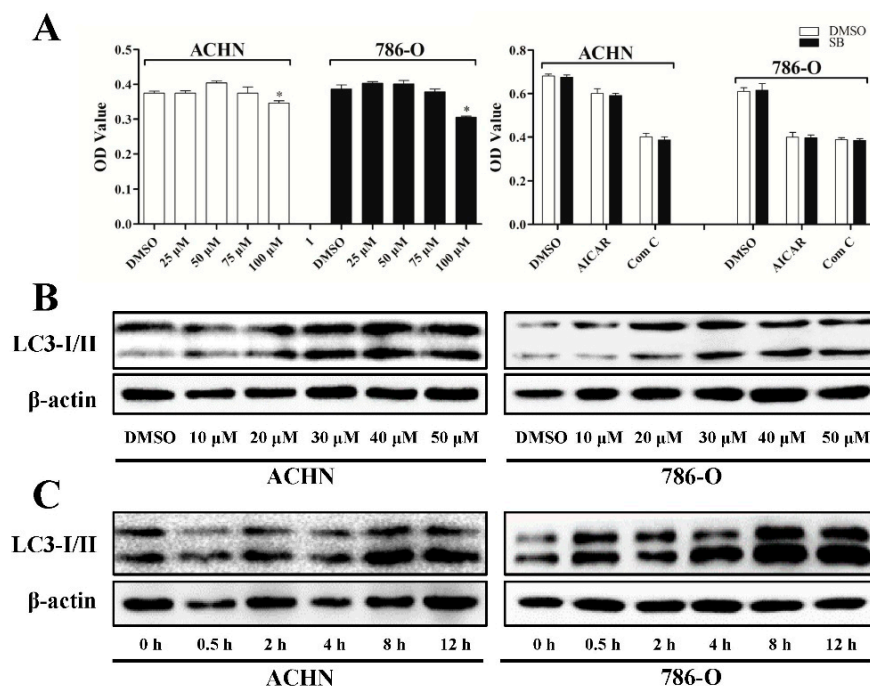

**Figure S1.** Effects of different doses of silibinin on cell viability and LC3-I/II levels. (A) MTT was performed to assess the impact of different doses of silibinin on cells viability after 24 h incubation with or without AICAR (1 mM) or Compound C (5 μM) pretreatment. Cells were treated with (B) different doses of silibinin (10, 20, 30, 40, and 50 μM) for 24 h or (C) treated with 50 μM of silibinin for different time periods (0, 2, 4, 8, and 12 h); autophagy marker LC3-I/II was checked. β-Actin was used as the loading control. Blots are representative of three separate experiments. Error bars represent SDs. \*  $p < 0.05$ .

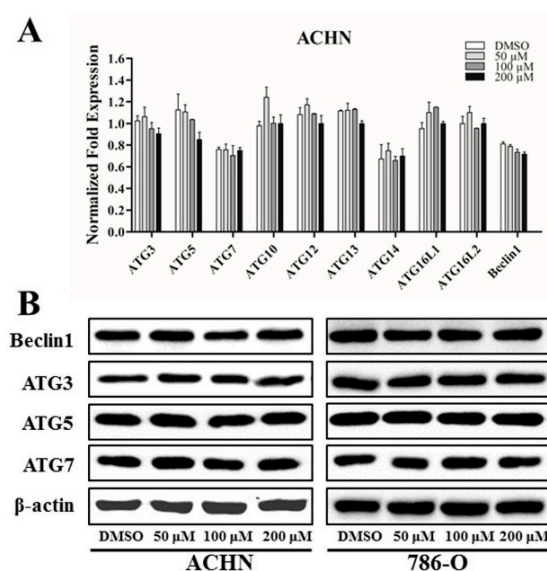

**Figure S2.** Effects of silibinin on autophagy-related gene expressions. After treatment with silibinin (50, 100, and 200 μM) for 24 h, the expression of autophagy-related ATGs was checked by real-time PCR (A) and Western blot (B). β2MG and β-actin were used as the control, respectively. Real-time PCR and blots are representative of three separate experiments. Error bars represent SDs.

**Table S1.** The primers used in real-time PCR.

| Gene              | Forward                 | Reverse                 |
|-------------------|-------------------------|-------------------------|
| <i>β2MG</i>       | GAGGCTATCCAGCGTACTCCA   | CGGCAGGCATACTCATCTTTT   |
| <i>SQSTM1/p62</i> | GCACCCCAATGTGATCTGC     | CGCTACACAAGTCGTAGTCTGG  |
| <i>Beclin1</i>    | CCATGCAGGTGAGCTTCGT     | GAATCTGCGAGAGACACCATC   |
| <i>ATG3</i>       | GACCCCGGTCCTCAAGGAA     | TGTAGCCCATTTGCCATGTTGG  |
| <i>ATG5</i>       | AAAGATGTGCTTCGAGATGTGT  | CACTTTGTCAGTTACCAACGTCA |
| <i>ATG7</i>       | CAGTTTGCCCCTTTTAGTAGTGC | CCAGCCGATACTCGTTCAGC    |
| <i>ATG10</i>      | AGACCATCAAAGGACTGTTCTGA | GGGTAGATGCTCCTAGATGTGAC |
| <i>ATG12</i>      | CTGCTGGCGACACCAAGAAA    | CGTGTTGCTCTACTGCCC      |
| <i>ATG13</i>      | TTGCTATAACTAGGGTGACACCA | CCCAACACGAACTGTCTGGA    |
| <i>ATG14</i>      | GCGCCAAATGCGTTCAGAG     | AGTCGGCTTAACCTTTCCTTCT  |
| <i>ATG16L1</i>    | AACGCTGTGCAGTTCAGTCC    | AGCTGCTAAGAGGTAAGATCCA  |
| <i>ATG16L2</i>    | TGGACAAGTTCTCAAAGAAGCTG | CCTCAGTGCACCAAGTGAT     |
